# Supplementary material for: Nuclear Laboratory Setup for Measuring the Soil Water Content in Engineering Physics Teaching Laboratories
Source: MDPI journal article supplement (doi:10.3390/agriengineering5020068), 2023-06-15
Supplement: s1 [file s1]

# Nuclear Laboratory Setup for Measuring the Soil Water Content in Engineering Physics Teaching Laboratories

## Supplementary Material

The following figure illustrates the simplified gamma-ray attenuation (GRA) system used in the soil water content measurements.

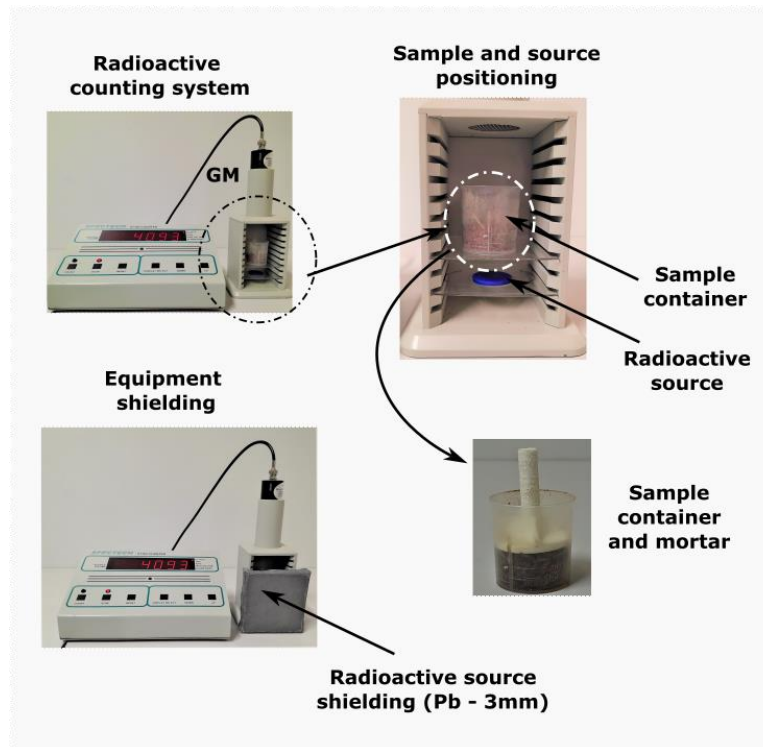

Figure S1. Photo showing the experimental apparatus used in the soil water content measurements. GM: Geiger-Müller detector.

Table S1 shows some of the data used in the calculations presented in the paper.

Table S1. Parameters employed for the measurement of the soil water content through the gamma-ray attenuation (GRA) method.

| Soil/Parameter                          | HeCa   | Cla    | SaCLo  | SiLo   |
|-----------------------------------------|--------|--------|--------|--------|
| $\mu_w$ ( $\text{cm}^2 \text{g}^{-1}$ ) | 0.0767 | 0.0767 | 0.0767 | 0.0767 |
| $\rho_s$ ( $\text{g cm}^{-3}$ )         | 1.08   | 1.20   | 1.10   | 1.03   |
| $\rho_p$ ( $\text{g cm}^{-3}$ )         | 2.63   | 2.16   | 2.22   | 2.25   |
| $m_c$ (g)                               | 3.51   | 3.51   | 3.51   | 3.51   |
| $V_s$ ( $\text{cm}^3$ )                 | 25.0   | 25.0   | 25.0   | 25.0   |
| $m_{c+s}$ (g)                           | 30.41  | 33.47  | 30.99  | 29.38  |
| $x_s$ (cm)                              | 2.696  | 2.696  | 2.696  | 2.665  |
| $\phi$ ( $\text{cm}^3 \text{cm}^{-3}$ ) | 0.591  | 0.445  | 0.505  | 0.540  |
| $V_{\text{por}}$ ( $\text{cm}^3$ )      | 14.77  | 11.13  | 12.62  | 13.50  |

$\mu_w$ : water mass attenuation coefficient;  $\rho_s$ : soil bulk density;  $\rho_p$ : soil particle density;  $m_c$ : container mass;  $V_s$ : volume of soil inside the container (leveled with the aid of a piston);  $m_{c+s}$ : contained + soil mass;  $x_s$ : soil sample thickness;  $\phi$ : soil total porosity;  $V_{\text{por}}$ : volume of pores. HeCa: Heavy Clay soil; Cla: Clay soil; SaCLo: Sandy Clay Loam soil; and SiLo: Silt Loam soil.

The water mass attenuation coefficient ( $\mu_w$ ) was obtained based on the value presented in the work by Ferraz and Mansell [1] for the Cs-137 radioactive source. The ratio between the dry soil mass ( $m_s$ ) and the soil volume ( $V_s$ ) inside the container was utilized to calculate the soil bulk density ( $\rho_s$ ). The particle density ( $\rho_p$ ) was obtained using the helium gas pycnometer method [2]. The thickness of the soil inside the container ( $x_s$ ) was measured using a caliper with a resolution of 0.02 mm. The porosity ( $\phi$ ) was calculated using the ratio of the soil bulk density to the particle density [3]. Finally, the volume of the pores ( $V_{por}$ ) was calculated by the product between the total porosity and the soil volume inside the container.

In Tables S2 and S3 the gravimetric soil water content and the beam intensity transmitted through the moist sample for each of the soils studied are presented.

Table S2. Gravimetric water content (G) during experimental soil moisture measurements by the gamma-ray attenuation method.

| Soil/Water<br>content level | HeCa  | Cla   | SaCLo | SiLo  |
|-----------------------------|-------|-------|-------|-------|
| G <sub>1</sub>              | 0     | 0     | 0     | 0     |
| G <sub>2</sub>              | 0.109 | 0.149 | 0.090 | 0.105 |
| G <sub>3</sub>              | 0.215 | 0.222 | 0.180 | 0.210 |
| G <sub>4</sub>              | 0.324 | 0.295 | 0.272 | 0.314 |
| G <sub>5</sub>              | 0.436 | 0.366 | 0.366 | 0.431 |

G<sub>1</sub> (g g<sup>-1</sup>) stands for dry soil. HeCa: Heavy Clay soil; Cla: Clay soil; SaCLo: Sandy Clay Loam soil; and SiLo: Silt Loam soil.

Table S3. Transmitted beam intensity (I) for the different gravimetric soil water content (G) values analyzed.

| Soil/Water<br>content | HeCa  | Cla  | SaCLo | SiLo  |
|-----------------------|-------|------|-------|-------|
| G <sub>1</sub>        | 29248 | 9594 | 9729  | 27605 |
| G <sub>2</sub>        | 28540 | 9293 | 9440  | 26759 |
| G <sub>3</sub>        | 27374 | 9062 | 9291  | 26024 |
| G <sub>4</sub>        | 27051 | 8905 | 9176  | 25858 |
| G <sub>5</sub>        | 26891 | 8836 | 9115  | 25168 |

G<sub>1</sub> (g g<sup>-1</sup>) stands for dry soil. HeCa: Heavy Clay soil; Cla: Clay soil; SaCLo: Sandy Clay Loam soil; and SiLo: Silt Loam soil.

## References

1. Ferraz, E.S.B.; Mansell, R.S. Determining water content and bulk density of soil by gamma-ray attenuation methods. Technical Bulletin No. 807, University of Florida, Gainesville, 1979.
2. Amoozegar, A.; Heitman, J.L.; Kranz, C.N. Comparison of soil particle density determined by a gas pycnometer using helium, nitrogen, and air. *Soil Sci. Soc. Am. J.* **2023**, *87*, 1–12.
3. Hillel, D. *Environmental Soil Physics*; Academic Press: San Diego, USA, 1998.
