# Supplementary material for: Nuclear Laboratory Setup for Measuring the Soil Water Content in Engineering Physics Teaching Laboratories
Source: MDPI journal article supplement (doi:10.3390/agriengineering5020068), 2023-06-15
Supplement: s1 [file s1]

Archive with 1 entries (1 files):
- agriengineering-2310792-supplementary.pdf
